# Supplementary material for: ACE-Neuro: A Tailored Exercise Oncology Program for Neuro-Oncology Patients – Study Protocol
Source: bioRxiv or medRxiv preprint supplement (doi:10.1101/2021.09.08.21263307), 2021-09-10
Supplement: Supplementary file [file media-1.pdf]

Supplementary File 1

Functional Fitness Assessment – In Person Assessment Overview

|                           |                                                                                                                                        |
|---------------------------|----------------------------------------------------------------------------------------------------------------------------------------|
| Resting Vital Measures    | Heart Rate<br>Blood Pressure                                                                                                           |
| Anthropometric Measures   | Height<br><i>Measured using a Seca 217 Stadiometer</i><br>Weight<br><i>Measured using a 16 Health Carter Beam Scale</i>                |
| Muscular Strength         | Grip Strength<br>Measured using a hand dynamometer, following the Canadian Physical Activity, Fitness, and Lifestyle Approach (CPAFLA) |
| Muscular Endurance        | 30-Second Sit-to-Stand                                                                                                                 |
| Balance                   | Single Leg Stance                                                                                                                      |
| Flexibility               | Shoulder Flexion<br><i>Measured using a goniometer</i><br>Sit-and-Reach                                                                |
| Cardiorespiratory Fitness | 6-Minute Walk Test                                                                                                                     |
